# Supplementary material for: Anion–cation interactions in a series of salts with substituted Hphen, Hbpy and H2bpy cations and [W(CN)8]4− anion: polymer with “super-short” N–H⋯N hydrogen bridges containing exclusively anions and H+
Source: Royal Society of Chemistry journal article supplement (doi:10.1039/d1dt03224k), 2021-01-01
Supplement: d1dt03224k1.pdf [file d1dt03224k1.pdf]

## Supporting Information

### Anion-cation interactions in a series of salts with substituted Hphen, Hbpy and H<sub>2</sub>bpy cations and [W(CN)<sub>8</sub>]<sup>4-</sup> anion: polymer with a “super-short” N-H...N hydrogen bridges containing exclusively anions and H<sup>+</sup>

Anna Jurowska,\* Maciej Hodorowicz, Krzysztof Kruczała, Janusz Szklarzewicz

Jagiellonian University, Faculty of Chemistry, Gronostajowa 2, 30-387 Kraków, Poland

#### Experimental Procedures

All chemicals, used in the syntheses, were of analytical grade (Aldrich) and were used as supplied. The cation exchange resin Amberlite IR 120 was used to synthesize the H<sup>+</sup> form of K<sub>4</sub>[W(CN)<sub>8</sub>]·2H<sub>2</sub>O. Microanalyses of carbon, hydrogen and nitrogen were performed using Elementar Vario MICRO Cube elemental analyzer. IR spectra were recorded on a Nicolet iS5 FT-IR spectrophotometer. Diffuse reflectance spectra were measured in BaSO<sub>4</sub> pellets with BaSO<sub>4</sub> as a reference on Shimadzu 3600 spectrophotometer equipped with an ISR-240 integrating sphere attachment. The EPR measurements were performed at room temperature with a Bruker ELEXSYS E-500 spectrometer operating at the X band (9.8 GHz) and 100 kHz magnetic field modulation equipped with super-high-sensitivity cavity ER 4122 SHQE. The EPR parameters of the complexes were determined by X<sub>epr</sub> software package. The amounts of metal cations were estimated by comparison of the sample spectrum intensity (second integral) with the standard developed in our laboratory.<sup>1, 2</sup> Thermogravimetric measurements were performed on a TGA/SDTA 851e Mettler Toledo Microthermogravimeter at scan speed 10 °/min in the 25 – 700 or 1000 °C range under Ar atmosphere.

#### Synthesis of K<sub>4</sub>[W(CN)<sub>8</sub>]·2H<sub>2</sub>O

Sodium tungstate(VI) dihydrate (100.0 g, 0.30 mol), KCN (300.0 g, 2.6 mol) and NaBH<sub>4</sub> (20.0 g, 0.52 mol) were dissolved in 450 mL of water. To the almost transparent solution (with only traces of undissolved NaBH<sub>4</sub>), vigorously stirred, 150 mL of acetic acid (80%) was added dropwise in two steps: 20 mL within a period of 1 minute and the rest within 1.5 hours, stopping addition of acid every time as the hydrogen evolution was too fast (till the end of the reaction). The reaction mixture was kept in a water bath to prevent an increase of temperature above 60 °C. Next, another portion of 150 mL of acetic acid was added within 60 minutes. The resultant orange solution (but sometimes greenish) was taken off the water bath and treated with 30% H<sub>2</sub>O<sub>2</sub>, which was added in 5 ml portions, until the solution color remained constantly dark orange (during this procedure the solution intensively boils). The transparent solution was left cooling in cold water, formed crystals were filtered off on Buchner filter and washed with ca. 100 mL of EtOH. The filtrate was connected with the EtOH used for washing and additional ca. 500 mL of EtOH was added till the end of product precipitation. The mixture was again filtered and the product was washed with EtOH. The crude product was combined together, dissolved in warm water, filtered warm, and precipitated again with EtOH. Yield 168 g, 95%. The purity was confirmed by elemental analysis, IR and UV-Vis spectra.

**Table S1.** The different synthetic conditions and yield observed for synthesis of K<sub>4</sub>[W(CN)<sub>8</sub>]·2H<sub>2</sub>O. t<sub>1</sub>-t<sub>5</sub> denotes period of time where acetic acid of volume V<sub>1</sub>-V<sub>5</sub> was added.

| Na <sub>2</sub> WO <sub>4</sub> ·2H <sub>2</sub> O | NaBH <sub>4</sub> | KCN   | water | time                                    | CH <sub>3</sub> COOH                   | time                                                    | CH <sub>3</sub> COOH                                   | yield |       |
|----------------------------------------------------|-------------------|-------|-------|-----------------------------------------|----------------------------------------|---------------------------------------------------------|--------------------------------------------------------|-------|-------|
| [g]                                                | [g]               | [g]   | [ml]  | t <sub>1</sub> /t <sub>2</sub><br>[min] | V <sub>1</sub> /V <sub>2</sub><br>[ml] | t <sub>3</sub> /t <sub>4</sub> /t <sub>5</sub><br>[min] | V <sub>3</sub> /V <sub>4</sub> /V <sub>5</sub><br>[ml] | [g]   | [%]   |
| 50.23                                              | 9.58              | 87.83 | 150   | 30                                      | 50                                     | 60                                                      | 100                                                    | 32.70 | 36.75 |
| 50.01                                              | 12.28             | 94.87 | 150   | 60                                      | 50                                     | 20                                                      | 100                                                    | 37.50 | 42.33 |
| 50.00                                              | 10.04             | 89.91 | 150   | 46                                      | 75                                     | 34                                                      | 75                                                     | 53.20 | 60.07 |
| 50.03                                              | 10.04             | 90.18 | 150   | 60                                      | 75                                     | 30                                                      | 75                                                     | 53.20 | 60.03 |
| 49.98                                              | 10.48             | 90.98 | 150   | 60                                      | 75                                     | 30                                                      | 75                                                     | 61.28 | 69.22 |
| 49.99                                              | 10.05             | 91.03 | 150   | 75                                      | 75                                     | 20                                                      | 75                                                     | 45.80 | 51.72 |

|        |       |        |     |       |        |          |           |        |        |
|--------|-------|--------|-----|-------|--------|----------|-----------|--------|--------|
| 100.03 | 20.38 | 181.30 | 300 | 65    | 150    | 90       | 150       | 83.58  | 47.17  |
| 100.16 | 20.05 | 181.27 | 300 | 45/60 | 75/75  | 30       | 150       | 81.01  | 45.66  |
| 50.01  | 10.12 | 92.12  | 150 | 60    | 60     | 30       | 45        | 32.50  | 36.69  |
| 50.03  | 10.08 | 91.02  | 150 | 60    | 75     | 35       | 45        | 46.30  | 52.24  |
| 49.77  | 10.01 | 92.02  | 150 | 60    | 60     | 30       | 60        | 43.78  | 49.66  |
| 50.03  | 10.11 | 91.25  | 300 | 60    | 60     | 30       | 60        | 35.62  | 40.19  |
| 50.21  | 10.23 | 150.41 | 300 | 60    | 60     | 30       | 90        | 67.90  | 76.34  |
| 50.12  | 10.21 | 150.80 | 200 | 60    | 60     | 30       | 90        | 66.07  | 74.42  |
| 50.12  | 10.11 | 150.20 | 225 | 60    | 50     | 30       | 100       | 45.00  | 50.69  |
| 50.17  | 10.11 | 163.02 | 220 | 60    | 50     | 30       | 100       | 99.00  | 111.40 |
| 51.01  | 10.18 | 132.00 | 220 | 60    | 50     | 30       | 100       | 53.25  | 58.93  |
| 51.03  | 10.30 | 153.41 | 250 | 60    | 50     | 30       | 100       | 25.90  | 28.65  |
| 50.07  | 9.98  | 154.23 | 300 | 60    | 60     | 30       | 90        | 69.00  | 77.80  |
| 50.18  | 10.00 | 151.37 | 250 | 60    | 60     | 30       | 90        | 69.50  | 78.19  |
| 100.02 | 20.18 | 301.24 | 500 | 60    | 150    | 30       | 150       | 119.61 | 67.51  |
| 100.01 | 20.03 | 301.49 | 500 | 90    | 150    | 45       | 150       | 131.13 | 74.02  |
| 100.00 | 20.12 | 303.02 | 450 | 30    | 50     | 90/15    | 100/150   | 139.08 | 78.51  |
| 100.04 | 19.97 | 302.67 | 450 | 1/100 | 20/130 | 60       | 150       | 167.72 | 94.64  |
| 100.49 | 20.10 | 300.10 | 450 | 130   | 100    | 50       | 100       | 150.74 | 84.68  |
| 100.06 | 20.04 | 201.07 | 450 | 50    | 30     | 50/30/30 | 15/75/125 | 129.51 | 73.07  |
| 100.13 | 20.22 | 301.38 | 450 | 50    | 70     | 30/60    | 8/150     | 90.48  | 51.01  |
| 100.04 | 20.01 | 300.57 | 450 | 1/100 | 20/130 | 60       | 150       | 166.81 | 94.13  |
| 99.98  | 19.99 | 299.98 | 450 | 1/100 | 20/130 | 60       | 150       | 168.25 | 95.00  |
| 100.02 | 20.05 | 300.01 | 450 | 1/100 | 20/130 | 60       | 150       | 169.01 | 95.39  |

#### Preparation of the salts 1-9

The  $K_4[W(CN)_6] \cdot 2H_2O$  (0.2 g, 0.34 mmol) was dissolved in water (ca. 5 mL) and passed through Amberlite IR 120 ion exchange resin in the  $H^+$  form. To the resulting solution respective cation (1.4 mmol) and 2 drops of 2M HCl were added and the mixture was left for crystallization. The products were filtrated, washed with acetone ( $Me_2CO$ ), and dried in the air. The yield was almost quantitative, in all cases was ca. 95±2%. The formulas of the cations are presented in Fig. S1.

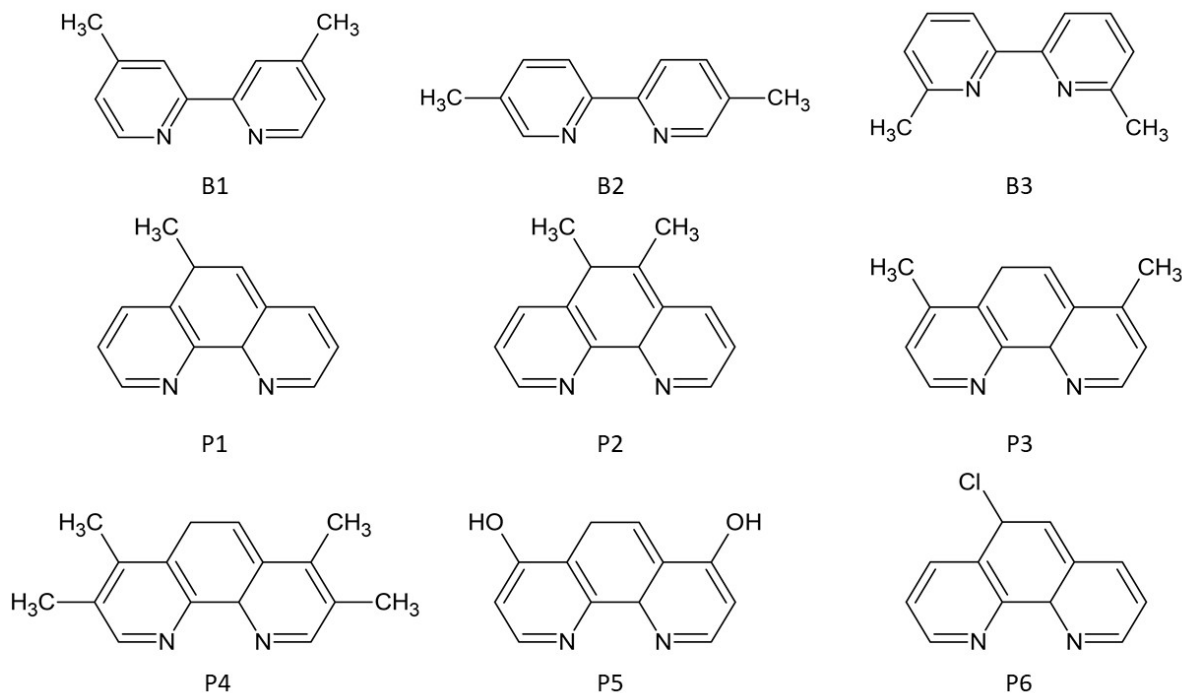

Fig. S1. The formulas of B1-P6 cations used in syntheses.

## Crystallographic data collection and structure refinement

Diffraction intensity data for a single crystal of **1**, **3a** and **3b** were collected at 100(2), 130(2) and 99.98(13) K respectively on the SuperNova (Rigaku) diffractometer with mirror-monochromated Cu K $\alpha$  radiation ( $\lambda = 1.54184 \text{ \AA}$ ) for **1** and Mo K $\alpha$  radiation ( $\lambda = 0.71073 \text{ \AA}$ ) for **3a** and **3b**. Cell refinement and data reduction were performed using CrysAlisPro firmware.<sup>3-5</sup> Positions of all of non-hydrogen atoms were determined by direct methods using SHELXL-2017/1.<sup>6, 7</sup> All non-hydrogen atoms were refined anisotropically using weighted full-matrix least-squares on  $F^2$ . Refinement and further calculations were carried out using SHELXL-2017/1.<sup>6, 7</sup> All hydrogen atoms joined to carbon atoms were positioned with idealized geometries and refined using a riding model with  $U_{\text{iso}}(\text{H})$  fixed at  $1.2 U_{\text{eq}}(\text{C}_{\text{arom}})$ . Due to the dynamic disorder of the O4 water molecule in structure **3a**, it was not possible to determine the positions of the hydrogen atoms for this molecule from the differential Fourier map. The figures were made using Diamond ver. 4.6.1 software.<sup>8</sup> CCDC 2075584, 2084630 and 2075764 contain the supplementary crystallographic data for **1**, **3a** and **3b** respectively. These data can be obtained free of charge from The Cambridge Crystallographic Data Centre via [www.ccdc.cam.ac.uk/data\\_request/cif](http://www.ccdc.cam.ac.uk/data_request/cif).

## Results and Discussion

**Table S2.** Crystal data and structure refinement for **1**, **3a** and **3b**.

|                                                         |                                | <b>1</b>                                                         | <b>3a</b>                                                        | <b>3b</b>                                                        |
|---------------------------------------------------------|--------------------------------|------------------------------------------------------------------|------------------------------------------------------------------|------------------------------------------------------------------|
| <b>Empirical formula</b>                                |                                | C <sub>44</sub> H <sub>44</sub> N <sub>14</sub> O <sub>2</sub> W | C <sub>44</sub> H <sub>45</sub> N <sub>14</sub> O <sub>4</sub> W | C <sub>20</sub> H <sub>20</sub> N <sub>10</sub> O <sub>2</sub> W |
| <b>Formula weight</b>                                   |                                | 984.78                                                           | 1017.79                                                          | 616.31                                                           |
| <b>Temperature [K]</b>                                  |                                | 100(2)                                                           | 130(2)                                                           | 99.98(13)                                                        |
| <b>Wavelength [Å]</b>                                   |                                | 1.54184                                                          | 0.71073                                                          | 0.71073                                                          |
| <b>Crystal system</b>                                   |                                | Monoclinic                                                       | Monoclinic                                                       | Orthorhombic                                                     |
| <b>Space group</b>                                      |                                | P 21/n                                                           | P 21/n                                                           | P bca                                                            |
| <b>Unit cell dimensions</b>                             | <b>a [Å]</b>                   | 17.3221(1)                                                       | 17.4930(1)                                                       | 15.3579(1)                                                       |
|                                                         | <b>b [Å]</b>                   | 10.9893(1)                                                       | 12.5476(1)                                                       | 14.2995(1)                                                       |
|                                                         | <b>c [Å]</b>                   | 22.6042(1)                                                       | 21.7724(2)                                                       | 20.5069(2)                                                       |
|                                                         | <b><math>\alpha</math> [°]</b> | 90                                                               | 90                                                               | 90                                                               |
|                                                         | <b><math>\beta</math> [°]</b>  | 90.158(1)                                                        | 109.047(1)                                                       | 90                                                               |
|                                                         | <b><math>\gamma</math> [°]</b> | 90                                                               | 90                                                               | 90                                                               |
| <b>Volume [Å<sup>3</sup>]</b>                           |                                | 4302.87                                                          | 4517.29(7)                                                       | 4503.53(6)                                                       |
| <b>Z</b>                                                |                                | 4                                                                | 4                                                                | 8                                                                |
| <b>Density (calculated) [Mg/m<sup>3</sup>]</b>          |                                | 1.520                                                            | 1.497                                                            | 1.818                                                            |
| <b>Absorption coefficient [mm<sup>-1</sup>]</b>         |                                | 5.421                                                            | 2.616                                                            | 5.170                                                            |
| <b>F(000)</b>                                           |                                | 1984                                                             | 2052                                                             | 2400                                                             |
| <b>Crystal size [mm<sup>3</sup>]</b>                    |                                | 1.00 × 0.10 × 0.10                                               | 0.10 × 0.10 × 0.10                                               | 0.20 × 0.10 × 0.10                                               |
| <b>Theta range for data collection [°]</b>              |                                | 3.210 to 77.064                                                  | 2.545 to 30.556                                                  | 1.986 to 33.460                                                  |
| <b>Index ranges</b>                                     |                                | -21 ≤ h ≤ 21<br>-13 ≤ k ≤ 13<br>-28 ≤ l ≤ 28                     | -24 ≤ h ≤ 24<br>-17 ≤ k ≤ 17<br>-30 ≤ l ≤ 30                     | -23 ≤ h ≤ 22<br>-22 ≤ k ≤ 21<br>-31 ≤ l ≤ 31                     |
| <b>Reflections collected</b>                            |                                | 128751                                                           | 74967                                                            | 271737                                                           |
| <b>Independent reflections</b>                          |                                | 9045 [R <sub>int</sub> = 0.0851]                                 | 13157 [R <sub>int</sub> = 0.0345]                                | 8480 [R <sub>int</sub> = 0.0745]                                 |
| <b>Completeness to theta [%]</b>                        |                                | 100.0                                                            | 99.7                                                             | 99.9                                                             |
| <b>Refinement method</b>                                |                                | Full-matrix least-squares on F <sup>2</sup>                      | Full-matrix least-squares on F <sup>2</sup>                      | Semi-empirical from equivalents                                  |
| <b>Data / restraints / parameters</b>                   |                                | 9045/0/580                                                       | 13157/0/574                                                      | 8480/0/324                                                       |
| <b>Goodness-of-fit on F2</b>                            |                                | 1.083                                                            | 1.105                                                            | 1.028                                                            |
| <b>Final R indices [I &gt; 2<math>\sigma</math>(I)]</b> |                                | R <sub>1</sub> = 0.0289<br>wR <sub>2</sub> = 0.0757              | R <sub>1</sub> = 0.0290<br>wR <sub>2</sub> = 0.0635              | R <sub>1</sub> = 0.0187<br>wR <sub>2</sub> = 0.0394              |
| <b>R indices (all data)</b>                             |                                | R <sub>1</sub> = 0.0293<br>wR <sub>2</sub> = 0.0760              | R <sub>1</sub> = 0.0382<br>wR <sub>2</sub> = 0.0678              | R <sub>1</sub> = 0.0242<br>wR <sub>2</sub> = 0.0406              |
| <b>Largest diff. peak and hole [e/Å<sup>3</sup>]</b>    |                                | 0.832 and -2.456                                                 | 1.676 and -0.914                                                 | 0.914 and -1.240                                                 |

**Table S3.** The selected bond lengths and angles for **1**, **3a** and **3b** [Å and °].

| <b>1</b>                |          | <b>3a</b>      |          | <b>3b</b>        |            |
|-------------------------|----------|----------------|----------|------------------|------------|
| <b>bond lengths [Å]</b> |          |                |          |                  |            |
| W(1)-C(19)              | 2.160(2) | W(1)-C(1)      | 2.165(3) | W(1)-C(5)        | 2.1682(15) |
| W(1)-C(49)              | 2.177(2) | W(1)-C(2)      | 2.174(3) | W(1)-C(21)       | 2.1440(15) |
| W(1)-C(51)              | 2.163(2) | W(1)-C(3)      | 2.172(3) | W(1)-C(23)       | 2.1631(15) |
| W(1)-C(53)              | 2.158(2) | W(1)-C(4)      | 2.161(3) | W(1)-C(25)       | 2.1620(15) |
| W(1)-C(55)              | 2.168(2) | W(1)-C(5)      | 2.165(3) | W(1)-C(27)       | 2.1652(15) |
| W(1)-C(57)              | 2.162(2) | W(1)-C(6)      | 2.164(3) | W(1)-C(29)       | 2.1569(15) |
| W(1)-C(59)              | 2.159(2) | W(1)-C(7)      | 2.168(3) | W(1)-C(31)       | 2.1585(15) |
| W(1)-C(61)              | 2.177(2) | W(1)-C(8)      | 2.165(3) | W(1)-C(33)       | 2.1605(15) |
| N(18)-C(19)             | 1.156(3) | N(1)-C(1)      | 1.142(4) | N(4)-C(5)        | 1.154(2)   |
| N(48)-C(49)             | 1.154(3) | N(2)-C(2)      | 1.149(4) | N(20)-C(21)      | 1.150(2)   |
| N(50)-C(51)             | 1.154(3) | N(3)-C(3)      | 1.150(4) | N(22)-C(23)      | 1.152(2)   |
| N(52)-C(53)             | 1.158(4) | N(4)-C(4)      | 1.143(4) | N(24)-C(25)      | 1.155(2)   |
| N(54)-C(55)             | 1.145(3) | N(5)-C(5)      | 1.147(4) | N(26)-C(27)      | 1.160(2)   |
| N(56)-C(57)             | 1.149(3) | N(6)-C(6)      | 1.152(4) | N(28)-C(29)      | 1.1547(19) |
| N(58)-C(59)             | 1.155(3) | N(7)-C(7)      | 1.150(4) | N(30)-C(31)      | 1.1547(19) |
| N(60)-C(61)             | 1.153(3) | N(8)-C(8)      | 1.146(4) | N(32)-C(33)      | 1.156(2)   |
| <b>angles [°]</b>       |          |                |          |                  |            |
| N(18)-C(19)-W(1)        | 177.1(2) | N(1)-C(1)-W(1) | 179.0(3) | N(4)-C(5)-W(1)   | 178.69(13) |
| N(48)-C(49)-W(1)        | 174.4(2) | N(2)-C(2)-W(1) | 178.1(2) | N(20)-C(21)-W(1) | 178.29(14) |
| N(50)-C(51)-W(1)        | 178.7(2) | N(3)-C(3)-W(1) | 179.4(3) | N(22)-C(23)-W(1) | 178.46(14) |
| N(52)-C(53)-W(1)        | 176.2(2) | N(4)-C(4)-W(1) | 176.1(3) | N(24)-C(25)-W(1) | 173.12(13) |
| N(54)-C(55)-W(1)        | 178.7(2) | N(5)-C(5)-W(1) | 178.0(3) | N(26)-C(27)-W(1) | 175.12(13) |
| N(56)-C(57)-W(1)        | 178.2(2) | N(6)-C(6)-W(1) | 177.7(3) | N(28)-C(29)-W(1) | 173.60(14) |
| N(58)-C(59)-W(1)        | 175.8(2) | N(7)-C(7)-W(1) | 177.6(3) | N(30)-C(31)-W(1) | 177.74(13) |
| N(60)-C(61)-W(1)        | 175.7(2) | N(8)-C(8)-W(1) | 178.3(3) | N(32)-C(33)-W(1) | 177.10(13) |

**Table S4.** The hydrogen bonds for **1**, **3a** and **3b** [Å and °].

| <b>D-H...A</b>         | <b>d(D-H)</b> | <b>d(H...A)</b> | <b>d(D...A)</b> | <b>&lt;(DHA)</b> |
|------------------------|---------------|-----------------|-----------------|------------------|
| <b>1</b>               |               |                 |                 |                  |
| N(9)-H(9N)...N(58)     | 0.88          | 2.16            | 2.898(3)        | 140.5            |
| N(25)-H(25N)...N(48)   | 0.88          | 2.22            | 2.976(3)        | 143.2            |
| C(27)-H(27)...N(50)#1  | 0.95          | 2.64            | 3.590(3)        | 176.7            |
| C(21)-H(21)...N(50)#1  | 0.95          | 2.44            | 3.391(3)        | 174.7            |
| C(41)-H(41)...N(18)#2  | 0.95          | 2.54            | 3.444(3)        | 160.0            |
| C(36)-H(36)...N(18)#2  | 0.95          | 2.41            | 3.331(3)        | 162.4            |
| C(8)-H(8)...N(60)      | 0.95          | 2.67            | 3.505(4)        | 146.4            |
| C(13)-H(13)...N(60)#3  | 0.95          | 2.61            | 3.340(4)        | 133.7            |
| C(24)-H(24)...N(52)    | 0.95          | 2.46            | 3.267(3)        | 143.2            |
| O(2)-H(2B)...N(50)#4   | 0.87(4)       | 2.07(4)         | 2.933(3)        | 172(3)           |
| O(2)-H(2A)...N(48)     | 0.78(6)       | 2.32(6)         | 3.094(3)        | 174(5)           |
| N(34)-H(34N)...N(58)#5 | 0.82(3)       | 2.03(3)         | 2.738(3)        | 145(3)           |
| O(1)-H(1A)...N(54)     | 0.92(6)       | 1.66(6)         | 2.565(3)        | 165(5)           |
| O(1)-H(1B)...N(52)#6   | 0.86(6)       | 1.80(6)         | 2.648(3)        | 170(6)           |
| O(1)-H(1C)...N(56)#7   | 0.96(4)       | 1.58(4)         | 2.543(3)        | 173(3)           |
| <b>3a</b>              |               |                 |                 |                  |
| N(10)-H(10N)...O(2)#1  | 0.90          | 1.89            | 2.765(3)        | 164.8            |
| C(12)-H(12)...O(3)#2   | 0.95          | 2.61            | 3.535(4)        | 164.1            |
| C(15)-H(15A)...O(2)#1  | 0.98          | 2.46            | 3.076(4)        | 120.1            |
| C(16)-H(16)...O(1)#3   | 0.95          | 2.52            | 3.438(4)        | 162.8            |
| N(12)-H(123)...N(11)   | 0.78          | 2.25            | 2.630(4)        | 110.1            |
| N(12)-H(123)...O(4)    | 0.78          | 2.22            | 2.904(4)        | 145.6            |
| C(24)-H(24)...O(1)     | 0.95          | 2.58            | 3.505(4)        | 163.1            |
| C(26)-H(26)...O(3)#4   | 0.95          | 2.61            | 3.512(4)        | 159.5            |
| N(13)-H(13N)...N(1)#4  | 0.88          | 2.03            | 2.871(3)        | 161.1            |
| C(38)-H(38)...N(4)#5   | 0.95          | 2.48            | 3.360(4)        | 154.6            |
| C(39)-H(39C)...N(5)#4  | 0.98          | 2.69            | 3.562(4)        | 148.4            |

|                        |         |         |            |        |
|------------------------|---------|---------|------------|--------|
| C(40)-H(40)...N(4)#5   | 0.95    | 2.61    | 3.452(4)   | 147.8  |
| C(42)-H(42)...N(6)#6   | 0.95    | 2.44    | 3.309(4)   | 152.0  |
| O(1)-H(1AO)...N(5)#4   | 0.79    | 2.09    | 2.871(3)   | 169.7  |
| O(1)-H(1BO)...N(3)     | 0.81    | 2.06    | 2.858(3)   | 170.7  |
| O(2)-H(2AO)...N(8)#7   | 0.77    | 2.12    | 2.877(3)   | 171.8  |
| O(2)-H(2BO)...O(1)     | 0.84    | 1.95    | 2.779(3)   | 166.8  |
| O(3)-H(3BO)...N(2)#6   | 0.82    | 2.11    | 2.928(3)   | 169.2  |
| O(3)-H(3AO)...N(7)#4   | 0.84    | 2.09    | 2.929(4)   | 176.1  |
| <b>3b</b>              |         |         |            |        |
| N(6)-H(6)...N(24)#1    | 0.88    | 2.02    | 2.8938(18) | 176.4  |
| N(17)-H(17)...O(1)     | 0.88    | 1.80    | 2.6718(18) | 173.4  |
| C(13)-H(13)...N(24)#1  | 0.95    | 2.68    | 3.158(2)   | 111.9  |
| C(8)-H(8)...O(1)       | 0.95    | 2.56    | 3.103(2)   | 116.5  |
| C(18)-H(18A)...N(22)   | 0.98    | 2.63    | 3.471(2)   | 144.1  |
| C(10)-H(10)...N(22)#2  | 0.95    | 2.53    | 3.372(2)   | 147.9  |
| O(2)-H(2A)...N(28)     | 0.93(3) | 1.66(3) | 2.5870(17) | 176(3) |
| O(2)-H(2C)...N(4)#3    | 0.85(3) | 1.79(3) | 2.6303(18) | 169(3) |
| O(1)-H(1B)...N(22)#4   | 0.82(3) | 2.09(3) | 2.902(2)   | 168(2) |
| O(1)-H(1A)...N(32)     | 0.88(3) | 1.95(3) | 2.8122(19) | 169(3) |
| O(2)-H(2B)...N(30)#5   | 0.91(3) | 1.69(3) | 2.5924(17) | 176(3) |
| N(20)-H(20N)...N(26)#6 | 0.97(4) | 1.68(4) | 2.6510(19) | 174(3) |

**Table S5.** The  $\pi\cdots\pi$  interactions for compounds **1** and **3a** [Å].

| compound                        | $\pi\cdots\pi$                 | $d(\pi\cdots\pi)$   | shift  | description                              |
|---------------------------------|--------------------------------|---------------------|--------|------------------------------------------|
| <b>1</b>                        | Cg1...Cg2                      | 3.4926(1) 3.4926(1) | 0.591  | Cg1: N(15)-C(10)-C(11)-C(12)-C(13)-C(14) |
|                                 | Cg2...Cg1                      | 3.6465(1) 3.9633(1) | 0.819  | Cg2: N(25)-C(20)-C(21)-C(22)-C(23)-C(24) |
|                                 | Cg2...Cg2 [1-x,1-y,-z]         | 3.9991(1) 3.9991(1) | 1.625  | Cg3: N(34)-C(35)-C(36)-C(37)-C(38)-C(39) |
|                                 | Cg3...Cg3 [1-x,y,1-z]          |                     | 2.176  | Cg4: N(45)-C(40)-C(41)-C(42)-C(43)-C(44) |
|                                 | Cg3...Cg4 [1-x,-y,1-z]         |                     | 2.396  |                                          |
|                                 | Cg4...Cg3 [1-x,-y,1-z]         |                     | 2.200  |                                          |
| <b>3a</b>                       | Cg1...Cg2 [1-x,-y,1-z]         | 3.5777(1)           | -0.961 | Cg1: N9-C9-C16-C17-C18-C19               |
|                                 | Cg1...Cg6 [1/2+x,1/2-y,1/2+z]  | 3.6975(1)           | 1.528  | Cg2: N10-C10-C14-C13-C12-C11             |
|                                 | Cg2...Cg1 [1-x,-y,1-z]         | 3.5777(1)           | 0.878  | Cg3: N11-C21-C28-C29-C30-C31             |
|                                 | Cg2...Cg5 [1/2+x,1/2-y,1/2+z]  | 4.0528(1)           | 1.742  | Cg4: N12-C22-C26-C25-C24-C23             |
|                                 | Cg3...Cg4 [-x,1-y,1-z]         | 3.6241(1)           | 1.581  | Cg5: N13-C33-C40-C41-C42-C43             |
|                                 | Cg3...Cg5 [1/2-x,1/2+y,1/2-z]  | 3.7944(1)           | 1.505  | Cg6: N14-C34-C38-C37-C36-C35             |
|                                 | Cg4...Cg3 [-x,1-y,1-z]         | 3.6241(1)           | 1.173  |                                          |
|                                 | Cg5...Cg3 [1/2-x,-1/2+y,1/2-z] | 3.7944(1)           | 1.330  |                                          |
| Cg6...Cg1 [-1/2+x,1/2-y,-1/2+z] | 3.6975(1)                      | 1.189               |        |                                          |

**Table S6.** The C-H... $\pi$  interactions for compound **1** and **3a** [Å and °].

| compound  | C-H... $\pi$                            | H...Cg | X...Cg    | X-H...Cg |
|-----------|-----------------------------------------|--------|-----------|----------|
| <b>1</b>  | C(14)-H(14)...Cg3 [3/2-x,1/2+y,1/2-z]   | 2.81   | 3.5882(1) | 139      |
|           | C(16)-H(16A)...Cg5 [3/2-x,1/2+y,1/2-z]  | 2.98   | 3.8415(1) | 148      |
|           | C(17)-H(17B)...Cg1 [3/2-x,-1/2+y,1/2-z] | 2.90   | 3.3942(1) | 112      |
| <b>3a</b> | C27-H27A...Cg6 [1/2-x,1/2+y,1/2-z]      | 2.96   | 3.6458(1) | 128      |

Cg5: N(9)-C(4)-C(5)-C(6)-C(7)-C(8)

## Thermogravimetric measurements

**Table S7.** The TG data for complexes 1-9. Scan speed 10° /min.

| Complex   | m [mg]  | T <sub>max</sub> [°C] | Δm <sub>exp</sub> [%] | Δm <sub>calc</sub> [%] | Attributed to                                                                    |
|-----------|---------|-----------------------|-----------------------|------------------------|----------------------------------------------------------------------------------|
| <b>1</b>  | 18.8767 |                       |                       |                        |                                                                                  |
|           | 17.8825 | 100                   | 5.21                  | 5.29                   | 3H <sub>2</sub> O                                                                |
|           | 14.1452 | 218                   | 24.94                 | 25.19                  | 4H <sub>2</sub> O + bpy                                                          |
|           | 8.5922  | 462                   | 54.56                 | 54.22                  | 4H <sub>2</sub> O + 2.6bpy                                                       |
|           | 7.0944  | 723                   | 62.50                 | 61.48                  | 4H <sub>2</sub> O + 3bpy                                                         |
| <b>2</b>  | 15.9067 |                       |                       |                        |                                                                                  |
|           | 15.2634 | 125                   | 4.04                  | 4.25                   | 2.5H <sub>2</sub> O                                                              |
|           | 7.8724  | 253                   | 50.51                 | 50.53                  | 5H <sub>2</sub> O + 2.3bpy                                                       |
|           | 4.2678  | 700                   | 73.17                 | 72.75                  | 5H <sub>2</sub> O + 3bpy + 2C <sub>2</sub> N <sub>2</sub>                        |
| <b>3a</b> | 34.1866 |                       |                       |                        |                                                                                  |
|           | 32.4744 | 115                   | 5.16                  | 5.29                   | 3H <sub>2</sub> O                                                                |
|           | 25.5762 | 206                   | 25.79                 | 25.22                  | 4H <sub>2</sub> O + bpy                                                          |
|           | 13.0268 | 364                   | 61.90                 | 61.54                  | 4H <sub>2</sub> O + 3bpy                                                         |
|           | 7.5587  | 995                   | 77.69                 | 76.84                  | 4H <sub>2</sub> O + 3bpy + 3C <sub>2</sub> N <sub>2</sub>                        |
| <b>3b</b> | 7.4814  |                       |                       |                        |                                                                                  |
|           | 7.0498  | 149                   | 5.75                  | 5.84                   | 2H <sub>2</sub> O                                                                |
|           | 4.8058  | 255                   | 35.92                 | 35.92                  | 2H <sub>2</sub> O + bpy                                                          |
|           | 3.8939  | 452                   | 48.08                 | 48.66                  | 2H <sub>2</sub> O + bpy + 2.5C <sub>2</sub> N <sub>2</sub>                       |
|           | 3.2656  | 745                   | 56.60                 | 56.31                  | 2H <sub>2</sub> O + bpy + 4C <sub>2</sub> N <sub>2</sub>                         |
| <b>4</b>  | 19.0593 |                       |                       |                        |                                                                                  |
|           | 17.7650 | 164                   | 6.79                  | 6.89                   | Me <sub>2</sub> CO                                                               |
|           | 15.9528 | 235                   | 16.30                 | 16.16                  | Me <sub>2</sub> CO + 0.4phen                                                     |
|           | 11.6858 | 420                   | 38.69                 | 39.35                  | Me <sub>2</sub> CO + 1.4phen                                                     |
|           | 9.990   | 770                   | 47.61                 | 48.62                  | Me <sub>2</sub> CO + 1.8phen                                                     |
| <b>5</b>  | 15.3992 |                       |                       |                        |                                                                                  |
|           | 14.8765 | 84                    | 3.39                  | 3.29                   | 2H <sub>2</sub> O                                                                |
|           | 14.6628 | 156                   | 4.78                  | 4.94                   | 3H <sub>2</sub> O                                                                |
|           | 11.5927 | 301                   | 24.72                 | 24.17                  | 3H <sub>2</sub> O + phen                                                         |
|           | 8.8362  | 505                   | 42.62                 | 43.41                  | 3H <sub>2</sub> O + 2phen                                                        |
|           | 7.4197  | 800                   | 51.82                 | 53.02                  | 3H <sub>2</sub> O + 2.5phen                                                      |
| <b>6</b>  | 10.6536 |                       |                       |                        |                                                                                  |
|           | 9.5491  | 156                   | 10.37                 | 10.75                  | 4H <sub>2</sub> O + Me <sub>2</sub> CO                                           |
|           | 8.0928  | 261                   | 24.04                 | 24.24                  | 4H <sub>2</sub> O + 2Me <sub>2</sub> CO + 0.5phen                                |
|           | 6.2251  | 343                   | 41.57                 | 41.63                  | 4H <sub>2</sub> O + 2Me <sub>2</sub> CO + 1.5phen                                |
|           | 4.8099  | 430                   | 54.85                 | 54.79                  | 4H <sub>2</sub> O + 2Me <sub>2</sub> CO + 2phen + C <sub>2</sub> N <sub>2</sub>  |
|           | 1.9037  | 996                   | 82.13                 | 81.11                  | 4H <sub>2</sub> O + 2Me <sub>2</sub> CO + 3phen + 3C <sub>2</sub> N <sub>2</sub> |
| <b>7</b>  | 18.2263 |                       |                       |                        |                                                                                  |
|           | 16.9756 | 137                   | 6.86                  | 6.56                   | 7H <sub>2</sub> O                                                                |
|           | 15.0459 | 260                   | 17.44                 | 17.81                  | 19H <sub>2</sub> O                                                               |
|           | 6.3697  | 430                   | 65.05                 | 67.05                  | 19H <sub>2</sub> O + 4phen                                                       |
|           | 4.9935  | 803                   | 72.60                 | 73.82                  | 19H <sub>2</sub> O + 5phen                                                       |
| <b>8</b>  | 28.3737 |                       |                       |                        |                                                                                  |
|           | 26.6914 | 183                   | 5.93                  | 6.08                   | 6H <sub>2</sub> O                                                                |
|           | 24.7867 | 275                   | 12.64                 | 12.05                  | 6H <sub>2</sub> O + 0.5phen                                                      |
|           | 21.1798 | 440                   | 25.35                 | 23.99                  | 6H <sub>2</sub> O + 1.5phen                                                      |
|           | 16.6955 | 802                   | 41.16                 | 41.90                  | 6H <sub>2</sub> O + 3phen                                                        |
| <b>9</b>  | 17.9729 |                       |                       |                        |                                                                                  |
|           | 16.8120 | 112                   | 6.46                  | 6.73                   | 4.5H <sub>2</sub> O                                                              |
|           | 15.6637 | 190                   | 12.85                 | 13.48                  | 9H <sub>2</sub> O                                                                |
|           | 14.0059 | 248                   | 22.07                 | 22.45                  | 9H <sub>2</sub> O + 0.5phen                                                      |
|           | 10.8893 | 437                   | 39.41                 | 40.40                  | 9H <sub>2</sub> O + 1.5phen                                                      |
|           | 7.9341  | 773                   | 55.85                 | 56.55                  | 9H <sub>2</sub> O + 2.4phen                                                      |

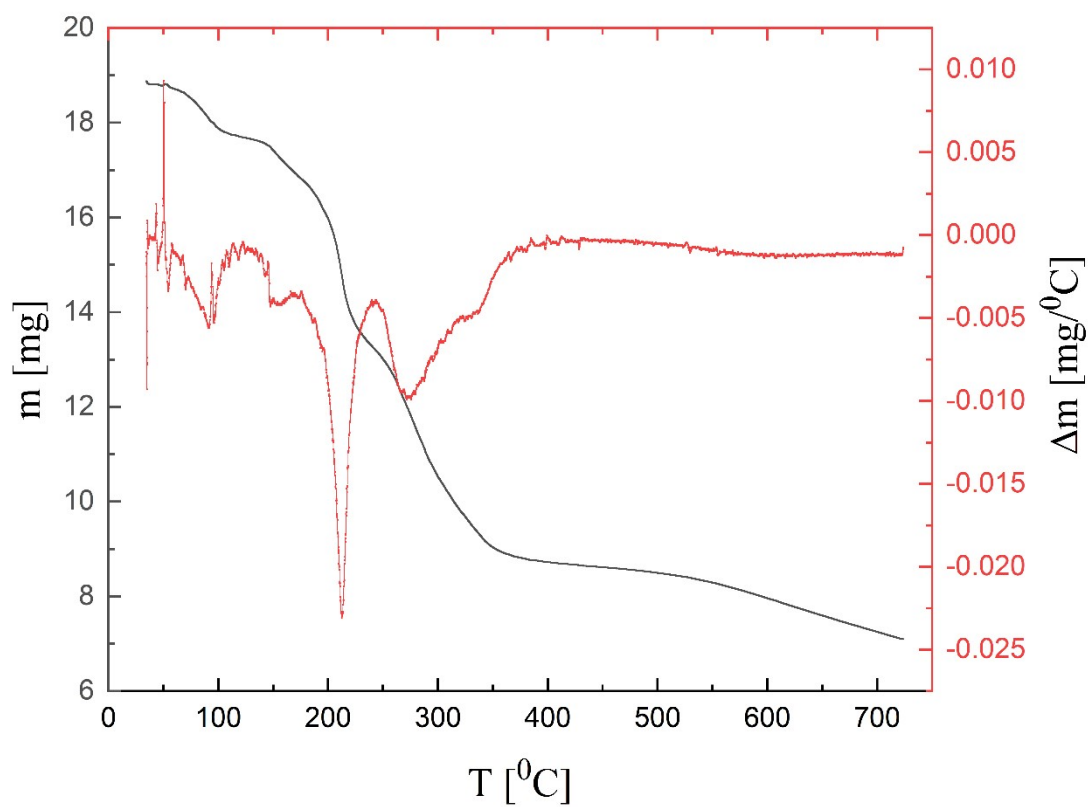

Fig S2. The TG and DTG curves for 1.

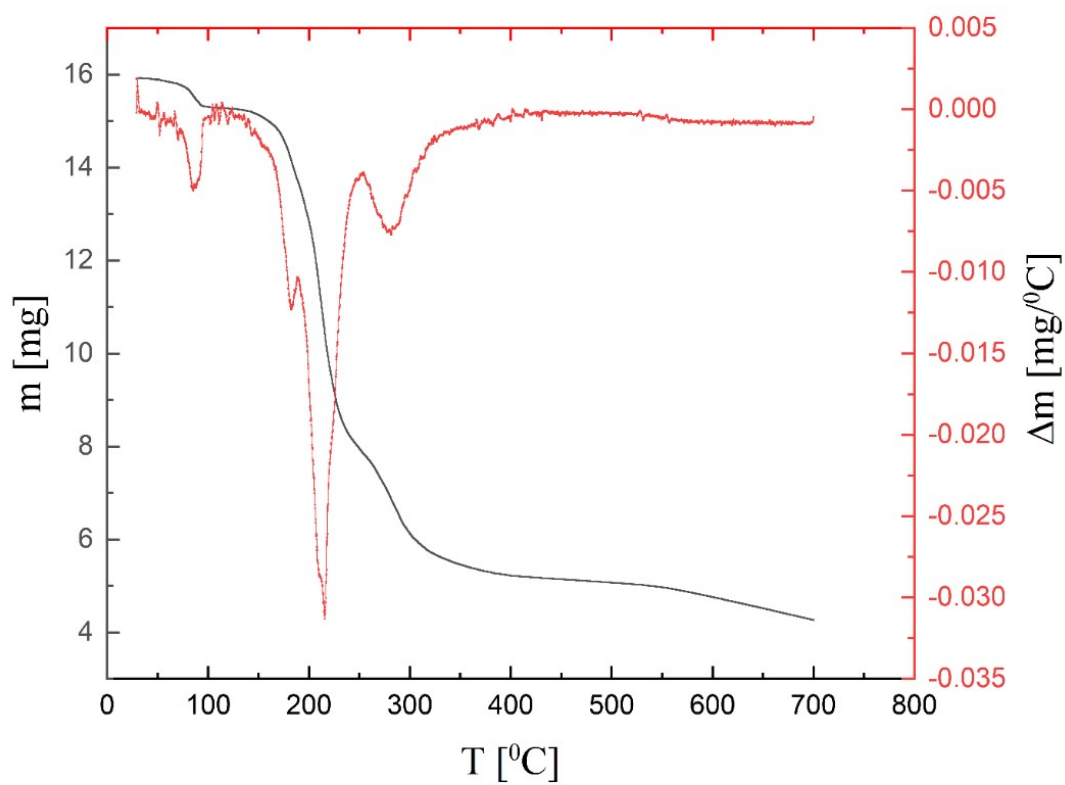

Fig S3. The TG and DTG curves for 2.

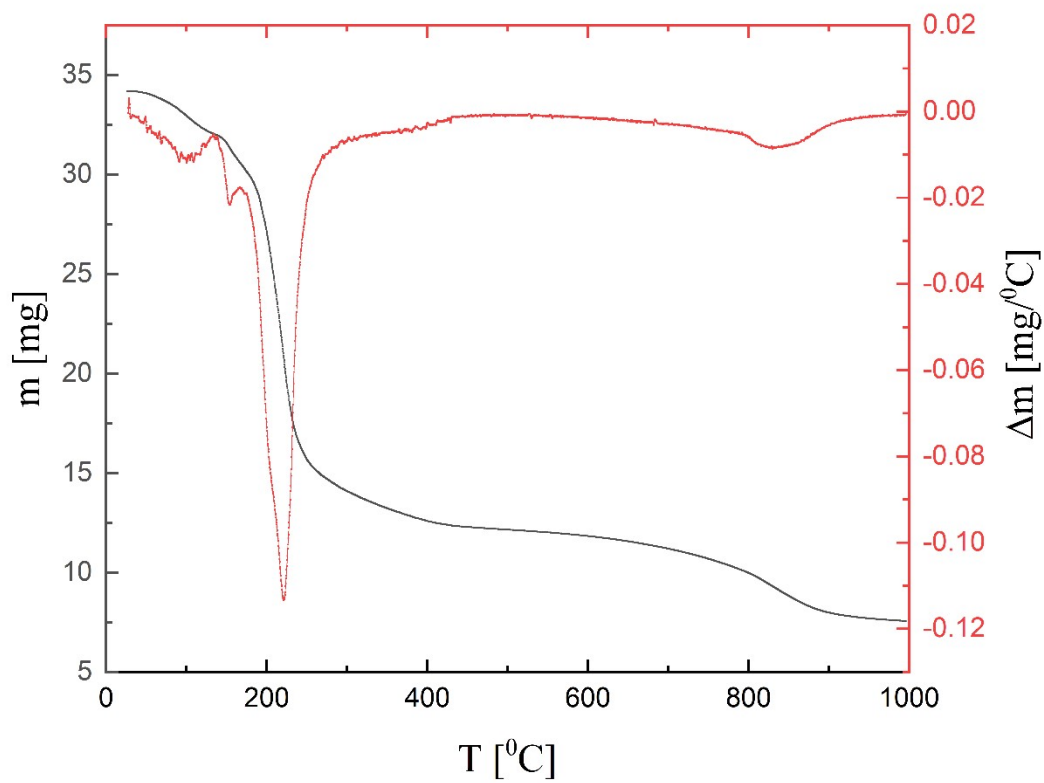

Fig S4. The TG and DTG curves for 3a.

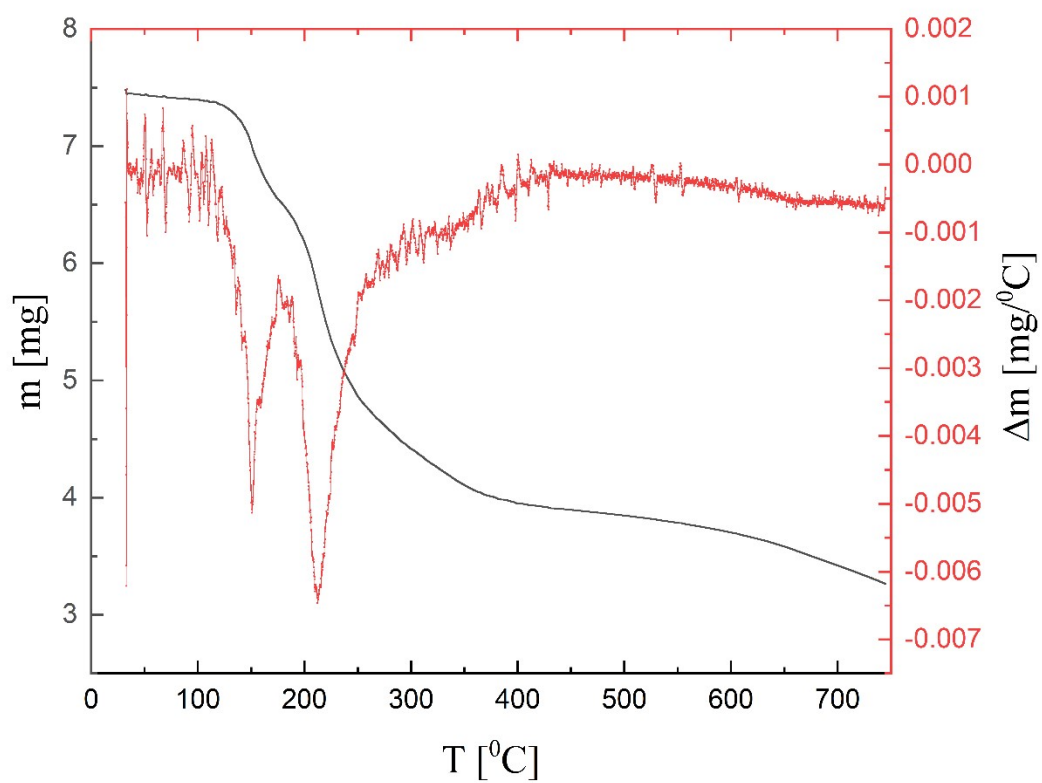

Fig S5. The TG and DTG curves for 3b.



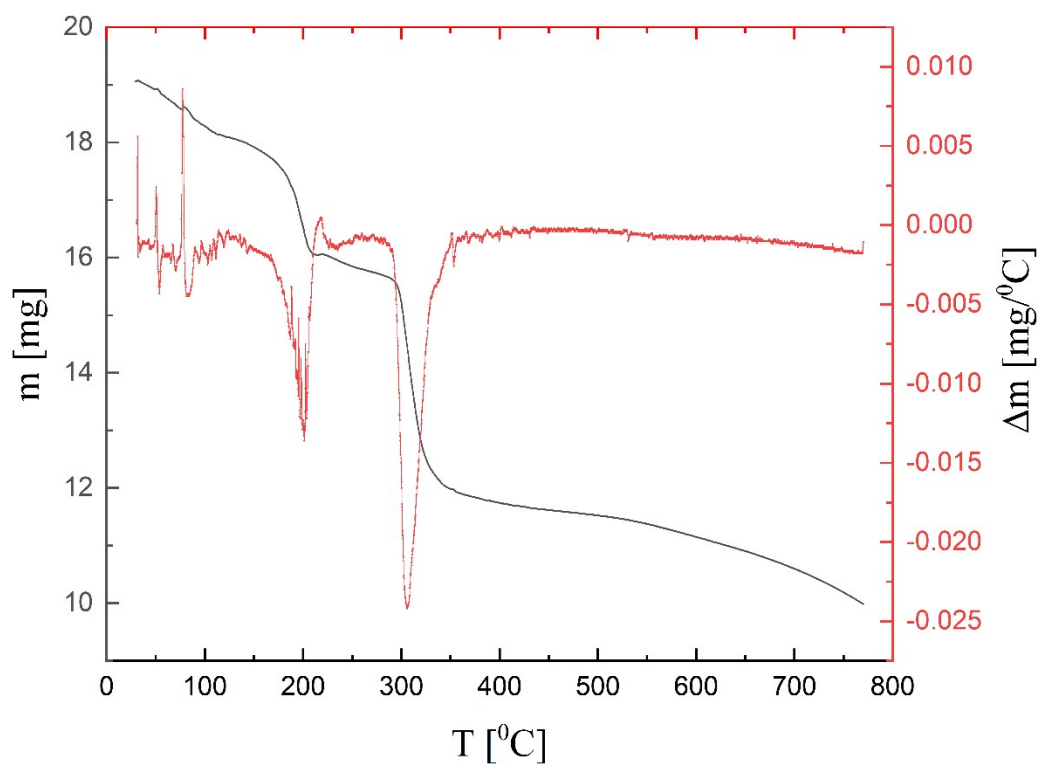

Fig S6. The TG and DTG curves for 4.

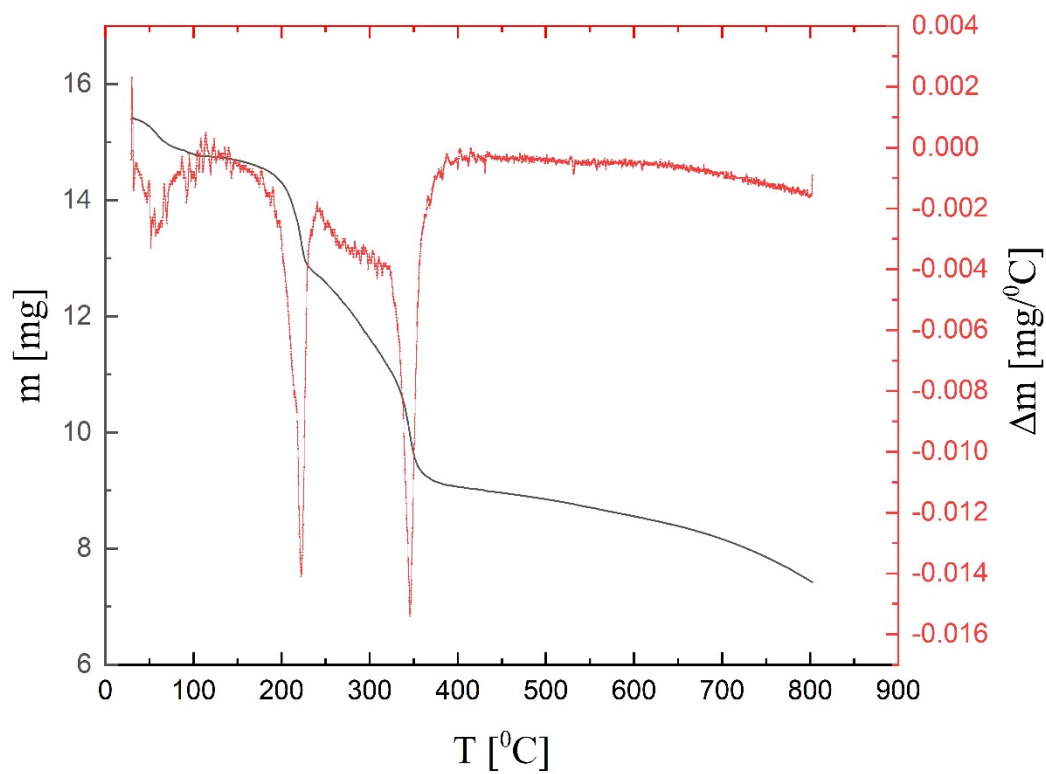

Fig S7. The TG and DTG curves for 5.

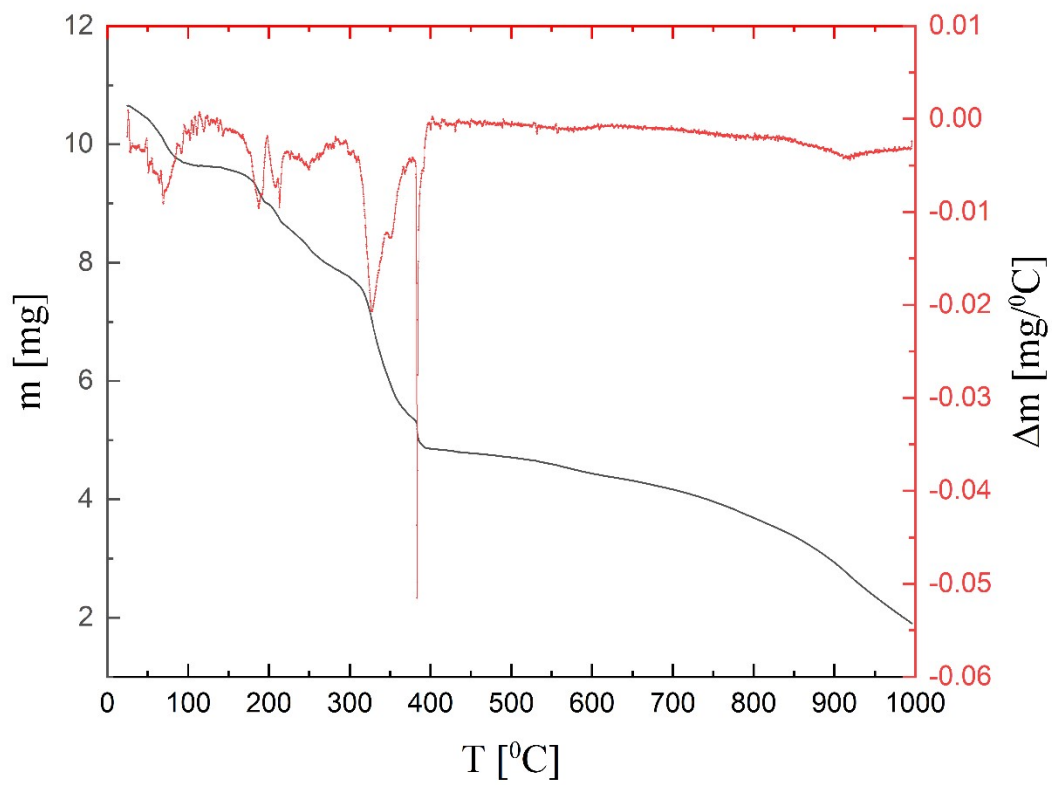

Fig S8. The TG and DTG curves for 6.

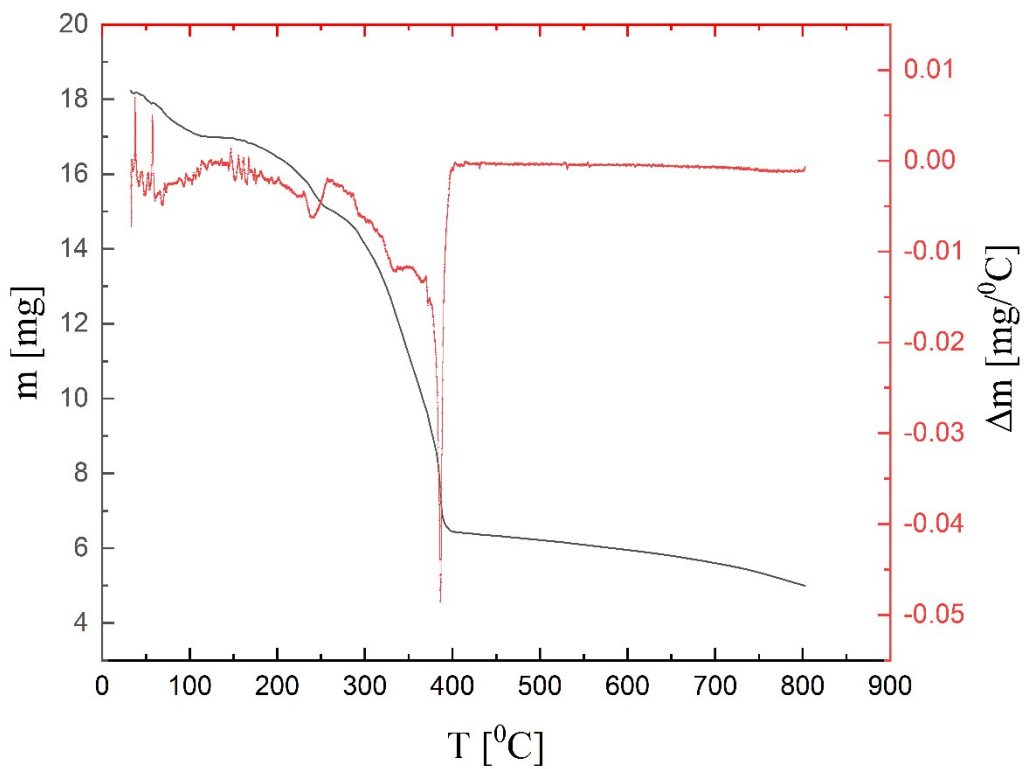

Fig S9. The TG and DTG curves for 7.

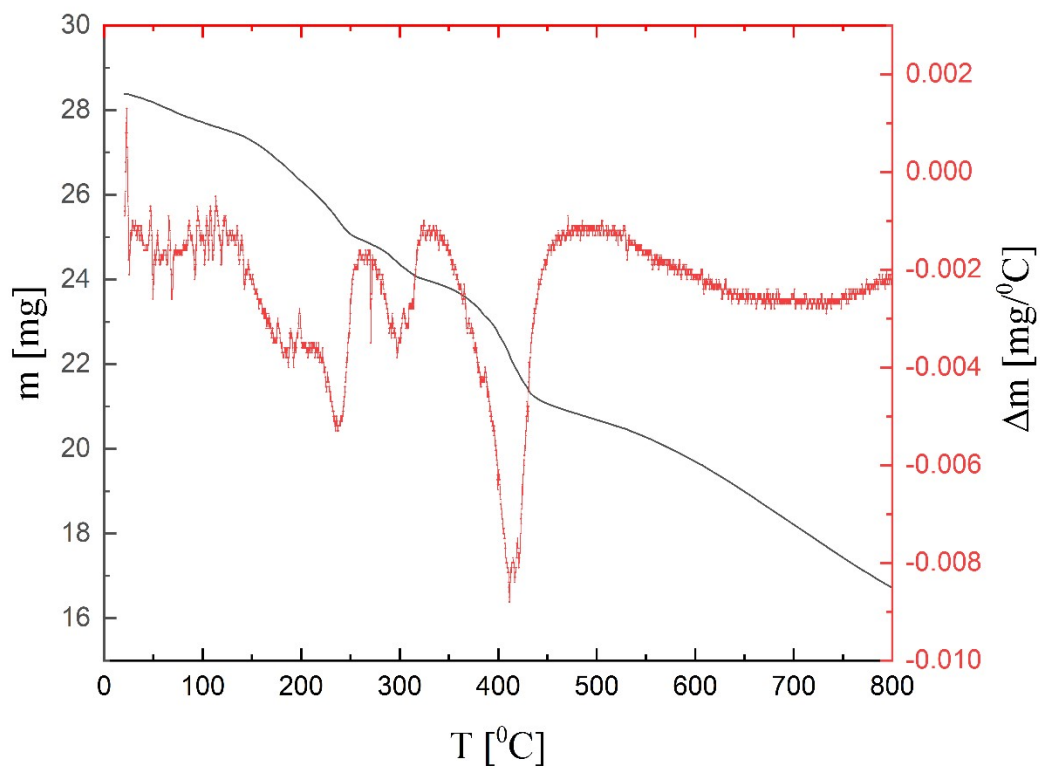

Fig S10. The TG and DTG curves for 8.

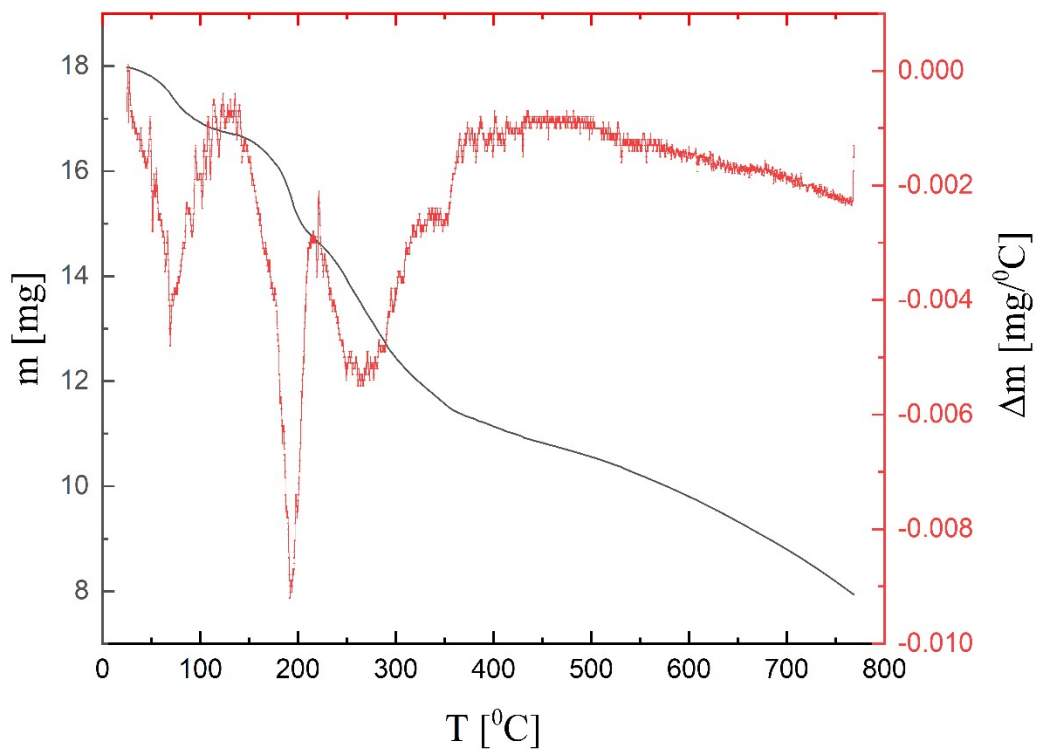

Fig S11. The TG and DTG curves for 9.

IR spectra

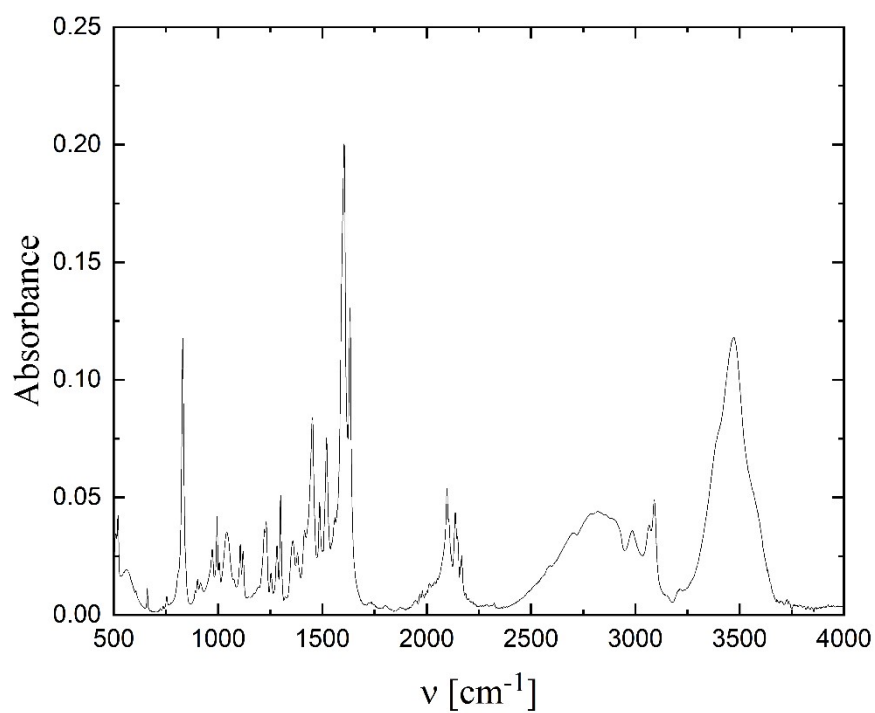

Fig S12. IR spectrum of 1.

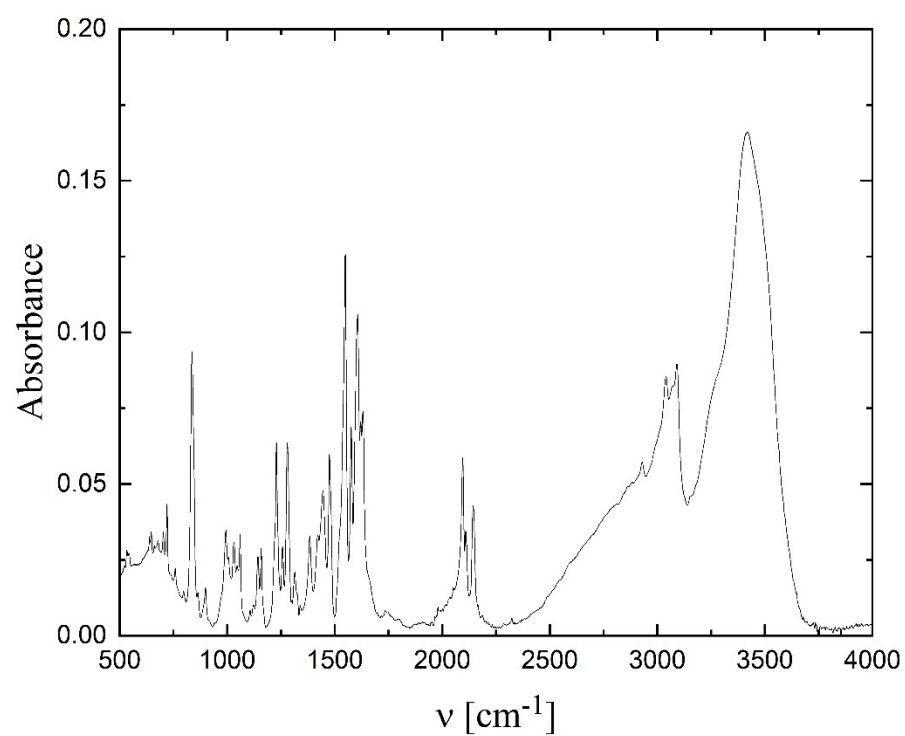

Fig S13. IR spectrum of 2.

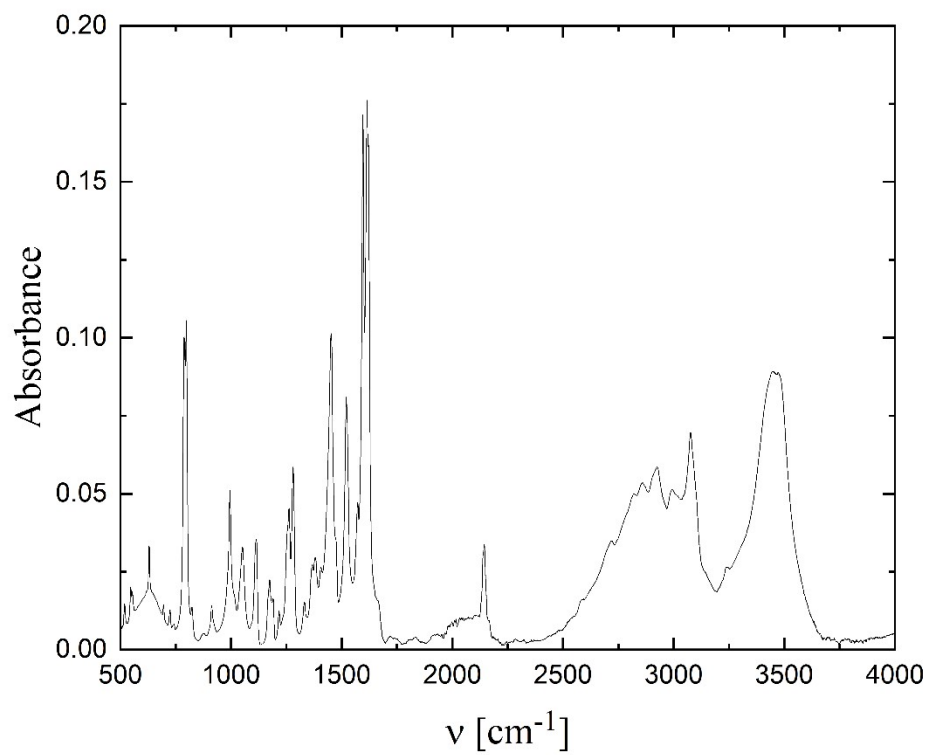

Fig S14. IR spectrum of **3a**.

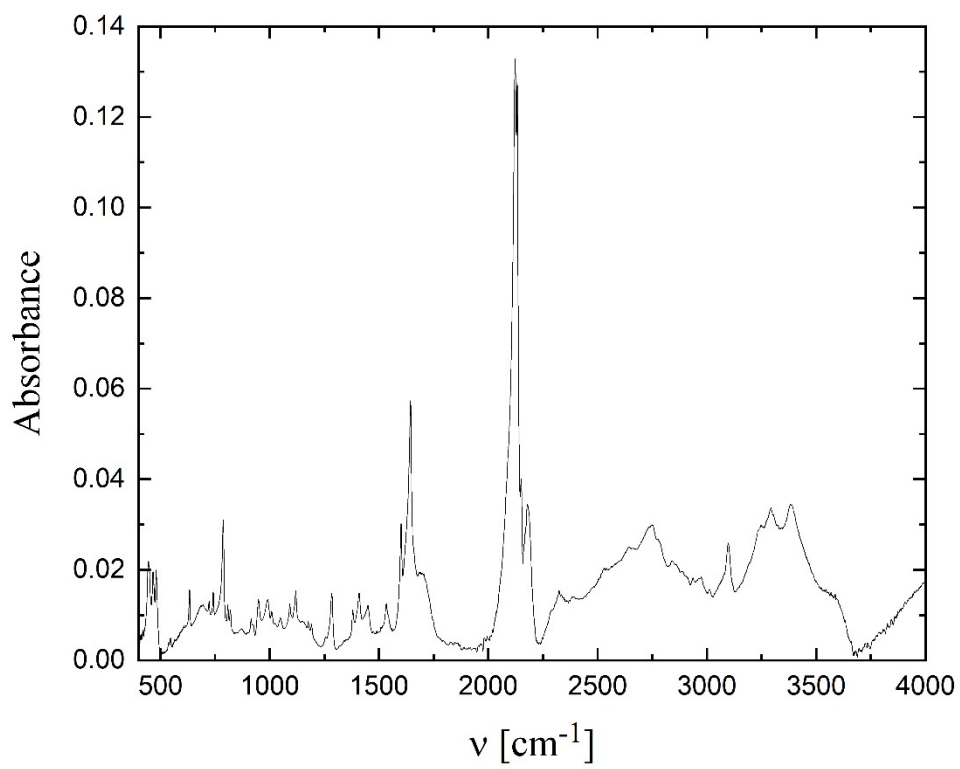

Fig S15. IR spectrum of **3b**.

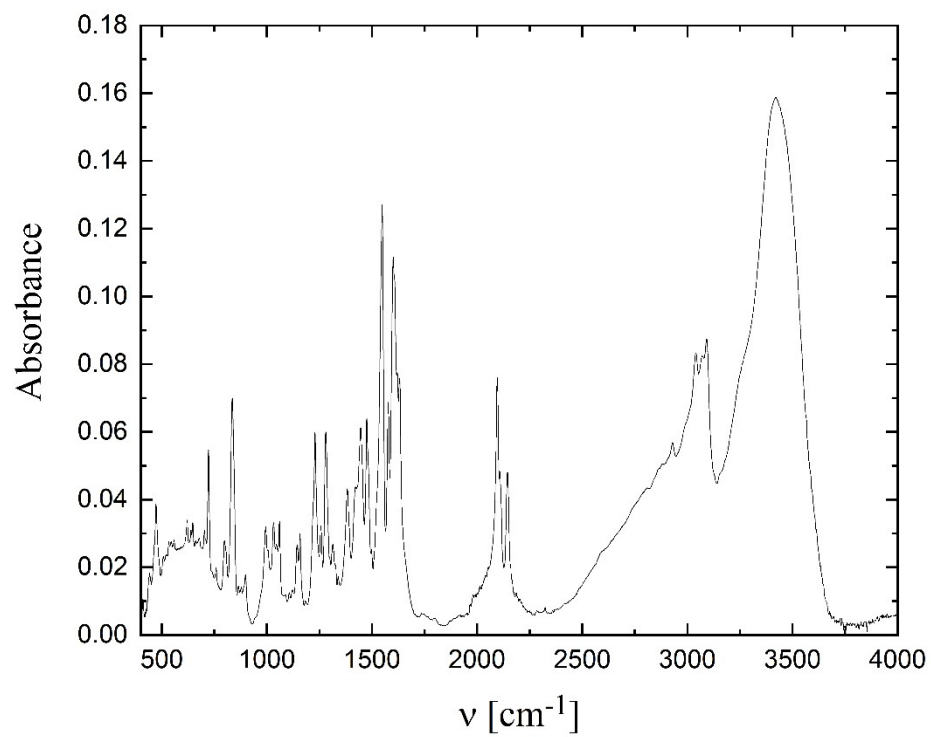

Fig S16. IR spectrum of 4.

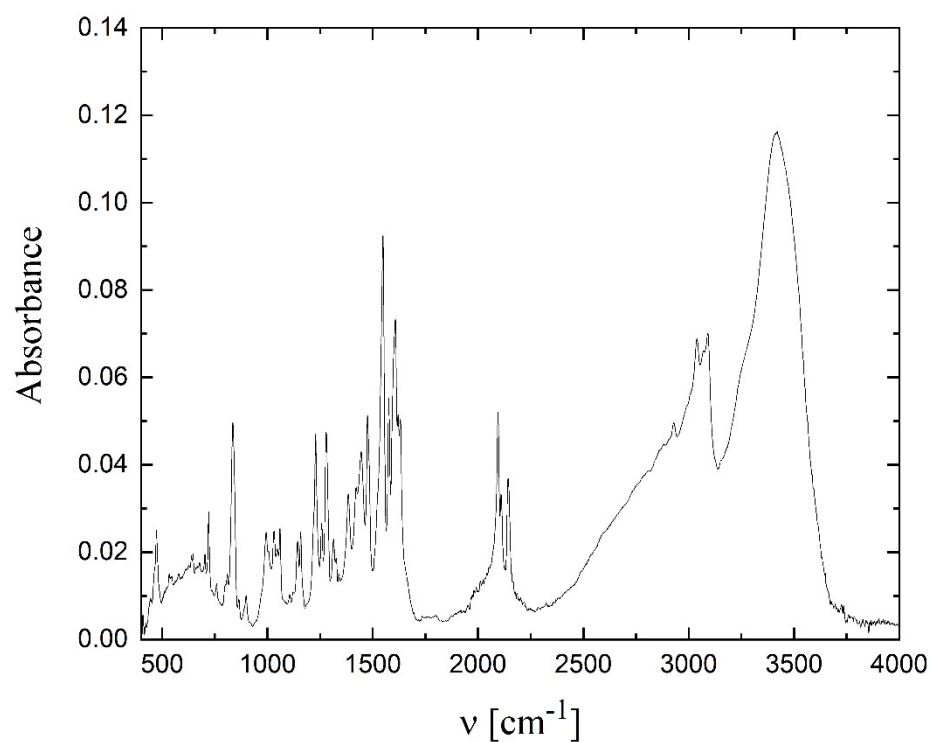

Fig S17. IR spectrum of 5.

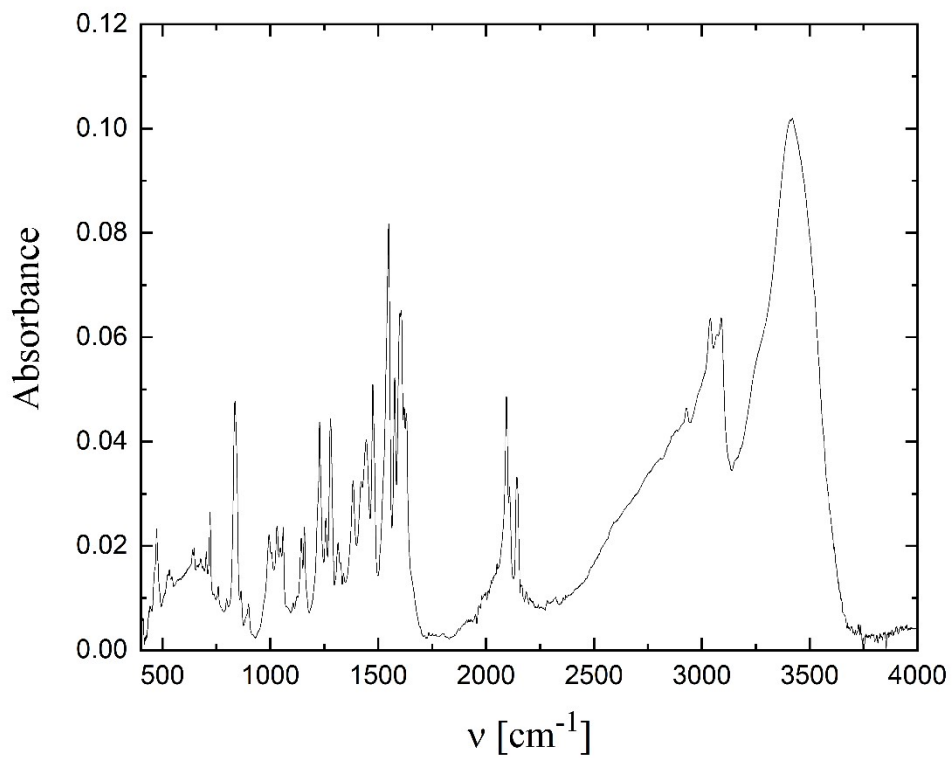

Fig S18. IR spectrum of 6.

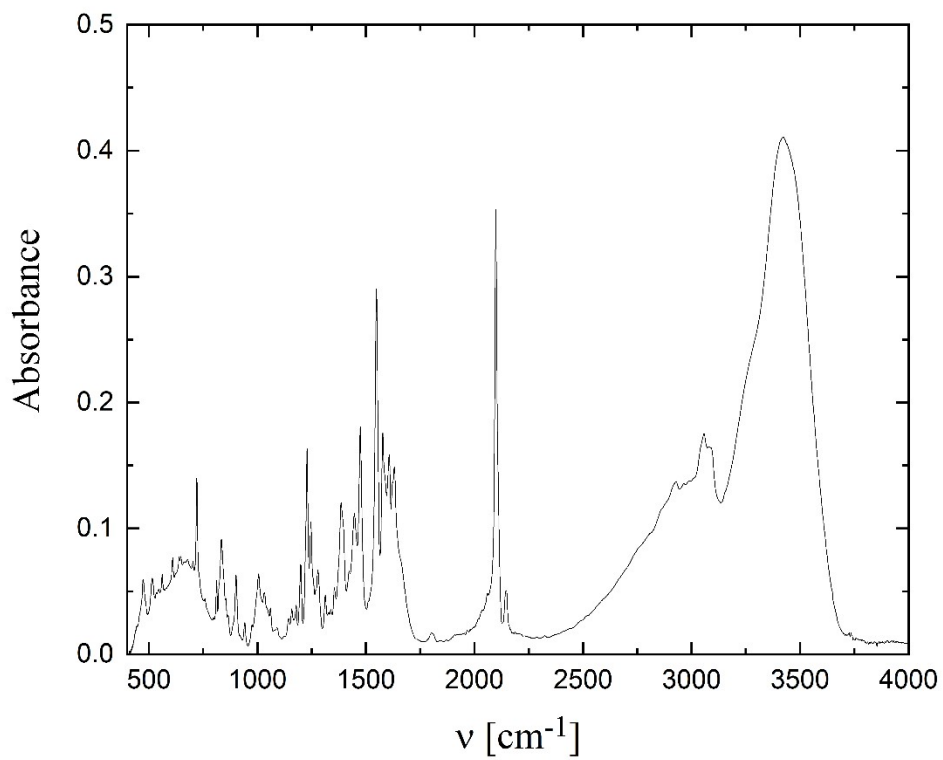

Fig S19. IR spectrum of 7.

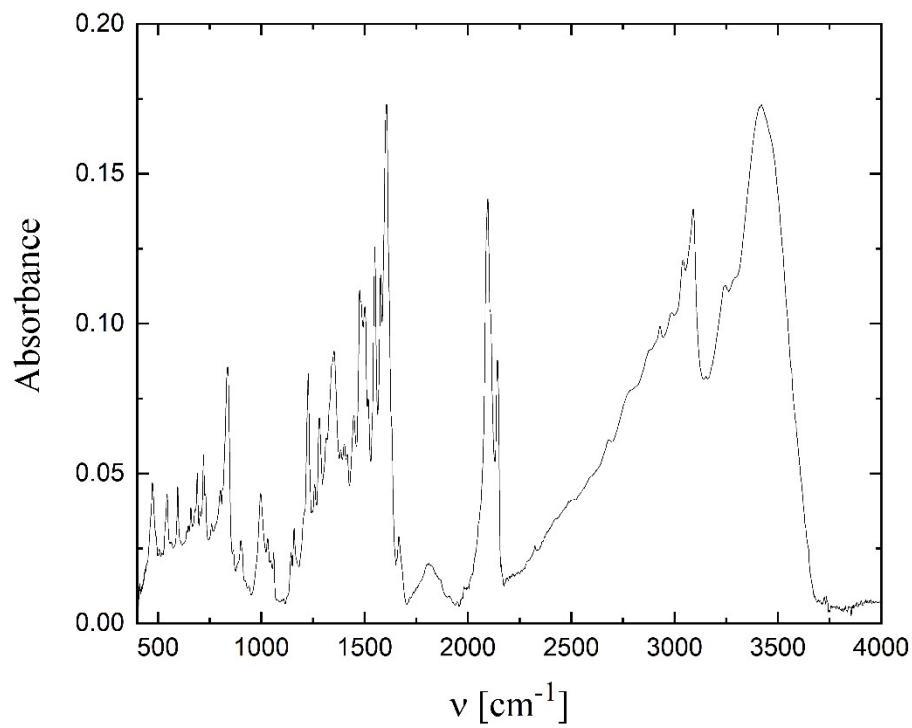

Fig S20. IR spectrum of 8.

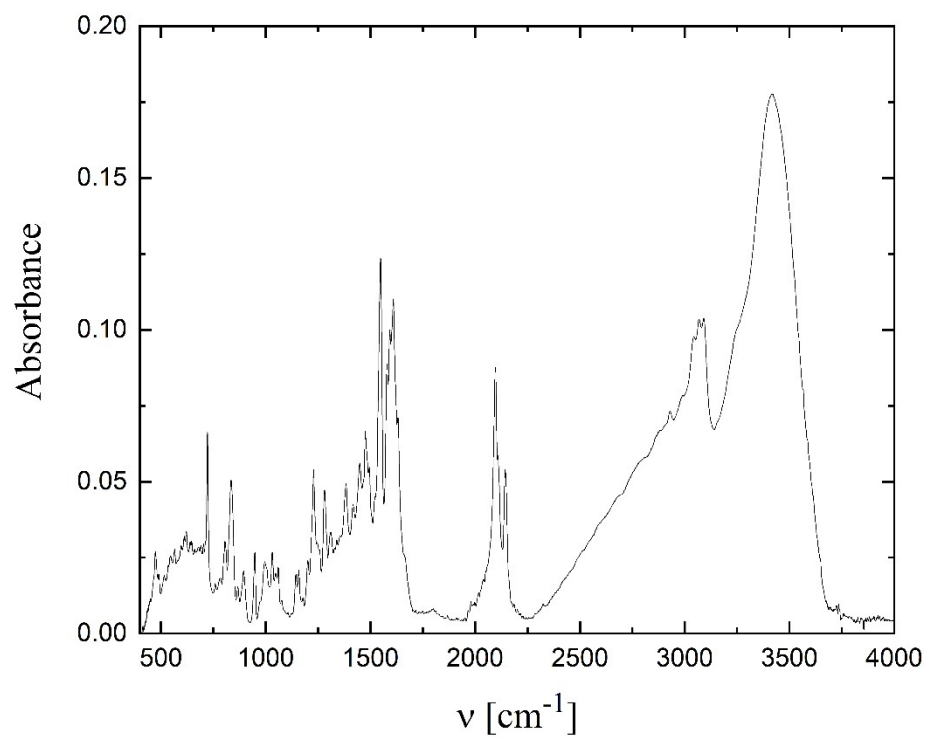

Fig S21. IR spectrum of 9.



## EPR measurements

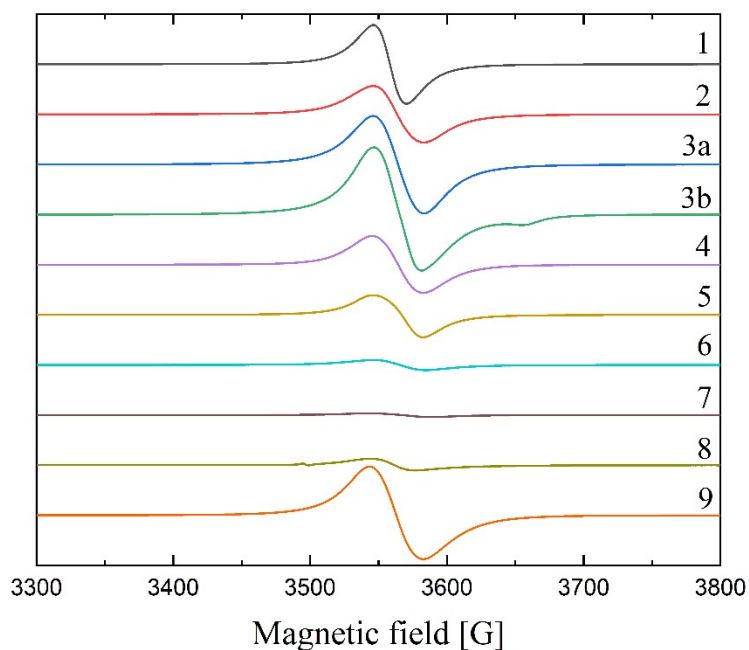

**Fig S22.** X-band EPR spectra of **1-9** registered at room temperature.

## References

- (1) K. Dyrek, A. Madej, E. Mazur, A. Rokosz, Standards for EPR measurements of spin concentration. *Colloids and Surfaces* 1990, **45**, 135-144.
- (2) K. Dyrek, A. Rokosz, A. Madej, E. Bidzińska, Quantitative EPR studies of transition metal ions in oxide, aluminosilicate and polymer matrices. *Appl. Magn. Reson.* 1996, **10**, 319-338.
- (3) Bruker, APEX2 (Version 2008.1-0). Bruker AXS Inc., Madison, Wisconsin, USA, 2008.
- (4) Bruker, SAINT-V6.28A. Data Reduction Software, 2001b.
- (5) Rigaku Oxford Diffraction, CrysAlisPro, Version. 1.171.36.20. Rigaku Oxford Diffraction, Yarnton, Oxfordshire, England, 2015.
- (6) G. M. Sheldrick, Crystal structure refinement with SHELXL. *Acta Crystallogr., Sect. C: Struct. Chem.* 2015, **71**, 3-8.
- (7) G. M. Sheldrick, SHELX2017, *Programs for crystal structure determination*, Universität Göttingen, Germany, 2017.
- (8) H. Putz, K. Brandenburg, *Diamond - Crystal and Molecular Structure Visualization Crystal Impact*, GbR, Kreuzherrenstr. 102, D-53227 Bonn.
